# Clinical Utility of Biochemical Markers of Bone Remodeling

NELSON B. WATTS

Remodeling is essential for bone health. It begins with resorption of old bone by osteoclasts, followed by the formation of new bone by osteoblasts. Remodeling is coupled (formation is linked to resorption). After middle age or perhaps beginning earlier, bone loss occurs because resorption exceeds formation. This imbalance is accentuated by estrogen deficiency as well as by many diseases and conditions. Biochemical markers that reflect remodeling and can be measured in blood or urine include resorption markers (e.g., collagen cross-links) and formation markers (e.g., alkaline phosphatase).

Bone markers exhibit substantial short-term and long-term fluctuations related to time of day, phase of the menstrual cycle, and season of the year, as well as diet, exercise, and anything else that alters bone remodeling. These biological factors, in addition to assay imprecision, produce significant intra- and interindividual variability in markers.

Bone marker measurements are noninvasive, inexpensive, and can be repeated often. Unfortunately, most of the studies that provided insight on clinical situations did not focus on markers as a primary endpoint. Bone markers have been useful in clinical practice and have been helpful in understanding the pathogenesis of osteoporosis and the mechanism of action of therapies. In clinical trials, markers aid in selecting optimal dose and in understanding the time course of onset and resolution of treatment effect. Clinical questions that might be answered by bone markers include diagnosing osteoporosis, identifying "fast bone losers" and patients at high risk of fracture, selecting the best treatment for osteoporosis, and providing an early indication of the response to treatment. Additional information is needed to define specific situations and cut points to allow marker results to be used with confidence in making decisions about individual patients.

© 1999 American Association for Clinical Chemistry

The skeleton serves several functions, including support of the body, protection of internal organs, providing sites of attachment for muscles, cavities for bone-forming cells, and a reservoir for minerals.

There are two basic types of bone: cortical, or compact bone, is well suited to the supporting, protective, and mechanical functions of bone. Cortical bone makes up the shafts of the long bones (appendicular skeleton) and the outer envelope of all bones and constitutes ~80% of skeletal mass. Cancellous, or trabecular, bone has a lacy or honeycombed structure well suited as a site for bone-forming cells and a large surface area that provides a reservoir for minerals. Cancellous bone makes up the inner parts of the bones of the vertebrae and pelvis and the ends of the long bones (the axial or central skeleton).

Bone remodeling, also called bone turnover, is an essential part of bone health. With daily activities, bone sustains microfractures and fatigue damage that must be repaired for bone to remain strong. Without remodeling, the skeleton would eventually collapse.

## Bone Remodeling

At any particular time, most of the skeleton is quiescent. Something, as yet unidentified, leads to a signal (or combination of signals) as yet unknown that initiates a remodeling cycle (Fig. 1). The cycle begins with recruitment from bone marrow monocyte precursors of multinucleated bone-resorbing cells called osteoclasts, which attach to the surface of bone. A ruffled border develops beneath the osteoclast, sealing the space beneath the cell. Into this subcellular space the osteoclast generates hydrogen ions, lactate, and proteolytic enzymes, which cause a breakdown of the protein matrix of bone and release of calcium and other bone mineral constituents. After the osteoclasts have excavated a resorption pit or lacuna, bone-forming cells called osteoblasts differentiate from connective-tissue precursors and begin the process of filling in the lacuna with a protein matrix, called osteoid, which subsequently becomes fully mineralized new bone.

Remodeling is regulated by both local and systemic factors, including electrical and mechanical forces, hormones (e.g., parathyroid hormone, thyroid hormone, vi-

Emory University School of Medicine, Atlanta, GA 30322.  
Address correspondence to: The Emory Clinic, Inc., 1365 Clifton Rd. NE,  
Atlanta, GA 30322. Fax 404-778-5230; e-mail [nwatts@emory.edu](mailto:nwatts@emory.edu).  
Received February 19, 1999; accepted April 20, 1999.

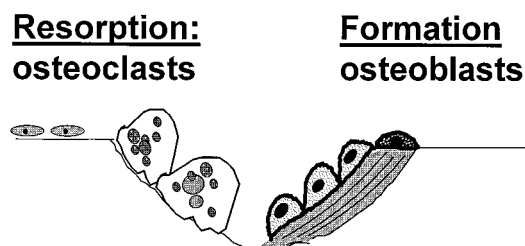

Fig. 1. Schematic representation of the bone remodeling cycle.

tamin D and its metabolites, estrogen, androgens, cortisol, calcitonin, and growth hormone), growth factors [e.g., insulin-like growth factor 1 (IGF-1) and transforming growth factor  $\beta$ ], and cytokines (e.g., interleukins 1 and 6). Remodeling takes place only on the surface of bone and in closely coordinated local packets. The cells involved in a particular remodeling event are referred to as a basic multicellular unit or bone metabolic unit (BMU). In a typical remodeling cycle, resorption takes  $\sim 7$ – $10$  days, whereas formation requires 2–3 months. Overall,  $\sim 10\%$  of bone is replaced each year. However, remodeling occurs exclusively on bone surfaces. Cancellous bone makes up only  $\sim 20\%$  of the skeletal mass, but 80% of the surface is cancellous bone. Because of this, cancellous bone is more metabolically active and more rapidly remodeled than cortical bone. Approximately 25% of cancellous bone is renewed each year, compared with only  $\sim 3\%$  of cortical bone.

The process of bone remodeling is often referred to as being “coupled”. Coupling means that bone formation is linked to bone resorption, and with rare exceptions, bone formation must be preceded by bone resorption. Coupling should not be confused with balance, which implies that the amount of bone that is removed is completely replaced. In fact, after age 35–40, every time a remodeling cycle is completed there is a net loss of bone because the amount of bone formed is less than the amount removed by resorption. Estrogen deficiency and other abnormalities of skeletal regulation will greatly increase the rate of remodeling and accentuate this imbalance.

### Composition of Bone

Bone tissue has three components: an organic matrix (called osteoid), bone mineral, and bone cells. Type 1 collagen makes up 90% of bone matrix, with the remaining 10% consisting of other proteins such as osteocalcin, osteonectin, and osteopontin.

The state of the skeleton can be evaluated by a variety of techniques, including histomorphometry, densitometry, and measurement of calcium fluxes. Histomorphometry is invasive, expensive, has a long turnaround time, and is limited to a single skeletal site (iliac crest). Densitometry is precise and noninvasive but slow to reveal changes. Measurement of calcium fluxes is technically difficult. Biochemical markers of bone remodeling provide a noninvasive means of complementing these tech-

niques or providing direct information. Markers respond to intervention more rapidly than does densitometry.

Biochemical markers that reflect the remodeling process and can be measured in blood or urine fall into three categories: (a) enzymes or proteins that are secreted by cells involved in the remodeling process, (b) breakdown products generated in the resorption of old bone, and (c) byproducts produced during the synthesis of new bone. Because of the phenomenon of coupling, these markers reflect the general process of bone turnover when bone is in a steady state; however, markers are usually classified by the part of the remodeling process that they mainly reflect in acute situations (i.e., resorption or formation). Because the process of resorption is shorter than the process of formation, resorption markers respond faster to changes in remodeling than do formation markers.

### Bone Resorption Markers

Bone resorption markers include an enzyme, tartrate-resistant acid phosphatase (TRAP),<sup>1</sup> and products of bone breakdown, which include calcium and bone matrix degradation products such as hydroxyproline, pyridinium cross-links, and telopeptides (Table 1).

Urinary calcium is affected by diet and renal function and is not sufficiently sensitive or specific for assessment of bone remodeling.

#### TRAP

Acid phosphatase is a lysosomal enzyme found in bone, prostate, platelets, erythrocytes, and spleen. Of the five isoenzymes of acid phosphatase, the bone isoform is tartrate resistant (TRAP) but unstable. TRAP can be measured in serum or plasma by electrophoresis (after treatment with tartrate) or by immunoassay. Serum acid phosphatase concentrations are typically higher than those in plasma because of the release of acid phosphatase from erythrocytes during clotting.

#### COLLAGEN BREAKDOWN PRODUCTS

Type 1 collagen, rich in the amino acid hydroxyproline, has a triple helix structure, with strands connected by cross-links between lysine or hydroxylysine residues that join the nonhelical amino- and carboxy-terminal ends of one collagen molecule to the helical portion of an adjacent molecule (1). The cross-links are pyridinolines and deoxypyridinolines (Fig. 2). During bone resorption, hydroxyproline and the pyridinium cross-links may be released either free or with fragments of the collagen molecule attached. They are not reutilized. Although some type 1 collagen is present in nonskeletal tissues,

<sup>1</sup> Nonstandard abbreviations: TRAP, tartrate-resistant acid phosphatase; Pyr, pyridinoline; Dpd, deoxypyridinoline; NTx, N-telopeptide; CTx, C-telopeptide; BAP, bone alkaline phosphatase; GLA, glutamic acid; PINP, procollagen 1 N-terminal extension peptide; PICP, procollagen 1 C-terminal extension peptide; PEPI, Postmenopausal Estrogen-Progestin Intervention; EPIDOS, Epidemiologie de L'osteoporose; and BMD, bone mineral density.

**Table 1. Markers of bone resorption.**

|                                                                            |
|----------------------------------------------------------------------------|
| Serum                                                                      |
| C-terminal pyridinoline cross-linked telopeptide of type I collagen (ICTP) |
| Free $\gamma$ -carboxy glutamic acid                                       |
| TRAP                                                                       |
| Urine                                                                      |
| Calcium                                                                    |
| Hydroxyproline (total, free)                                               |
| Pyr (free, total)                                                          |
| Dpd (free, total)                                                          |
| NTx                                                                        |
| C-telopeptide (ICTP)                                                       |
| Hydroxylysine glycosides                                                   |

bone has a much higher proportion and a much higher turnover.

**Hydroxyproline.** Collagen is rich in the amino acid proline, which undergoes posttranslational hydroxylation to hydroxyproline. Most of the free hydroxyproline liberated from bone is catabolized in the liver; ~10% is released in small polypeptide chains that are excreted in the urine. Hydroxyproline is also liberated by the breakdown of complement and nonskeletal collagen, including dietary collagen, and by the breakdown of procollagen extension peptides, which are products of bone formation. Approximately 50% of urinary hydroxyproline is derived from bone collagen breakdown (2). Hydroxyproline is usually measured in urine by colorimetry or HPLC after hydrolysis to convert peptide and polypeptide forms to the free form.

**Pyridinium cross-links (pyridinoline and deoxypyridinoline).** Posttranslational modification of lysine and hydroxylysine produces the nonreducible pyridinium cross-links, pyridinoline (Pyr) and deoxypyridinoline (Dpd), that sta-

bilize mature collagen. Both Pyr and Dpd are released from bone in a ratio of approximately 3:1. Dpd is relatively specific for bone; Pyr is also found in articular cartilage and in soft tissues (ligaments and tendons). Approximately 60% of the cross-links released during resorption are bound to protein, with the remaining 40% being free (not protein bound). Pyridinium cross-links are not metabolized or absorbed from the diet (3). Pyr and Dpd can be measured in urine by HPLC or immunoassay (4–8) either before or after hydrolysis.

**Cross-linked telopeptides.** In the process of bone resorption, amino- and carboxy-terminal fragments of collagen are released with cross-links attached. These fragments with attached cross-links are called telopeptides. N-telopeptides (NTx) and C-telopeptides (CTx) are excreted in the urine. NTx is measured by immunoassay using an antibody to the  $\alpha$ -2 chain of the NTx fragment (which contains the pyridinium cross-links, but the assay does not recognize the cross-link itself) (9). CTx is measured by immunoassay (10). Urine has been the most convenient sample for assay, but efforts have been directed at developing serum assays (11–14).

### Bone Formation Markers

Bone formation markers include an enzyme (alkaline phosphatase) and three byproducts of bone matrix synthesis (osteocalcin and amino- and carboxy-terminal procollagen I extension peptides; Table 2).

#### ALKALINE PHOSPHATASE

Osteoblasts are rich in alkaline phosphatase; however, alkaline phosphatase, an enzyme associated with the plasma membrane of cells, is also found in liver, intestine, and placenta (15), all of which may contribute to the total amount of alkaline phosphatase found in blood. The bone isoenzyme predominates in childhood and particularly during puberty; however, in adults the bone and liver isoenzymes contribute approximately equally to the total, with the intestinal fraction accounting for <10%. The function of alkaline phosphatase is unknown. The condition hypophosphatasia, in which the enzyme is lacking, is characterized by osteomalacia, suggesting that alkaline phosphatase has a role in the mineralization of newly formed bone. Measurement of total serum alkaline phosphatase is useful when the amount from bone is excep-

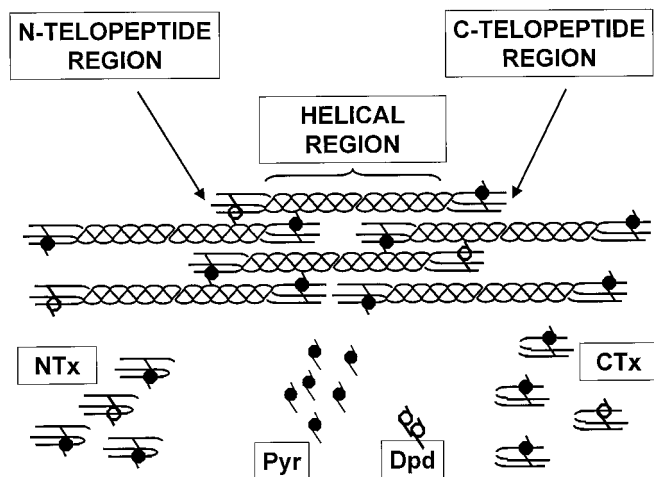

Fig. 2. Structure of type I collagen and cross-link degradation products.  
○, Dpd; ●, Pyr.

**Table 2. Markers of bone formation.**

|                                     |
|-------------------------------------|
| Alkaline phosphatase                |
| Total alkaline phosphatase          |
| BAP                                 |
| Osteocalcin (bone-GLA protein, BGP) |
| Procollagen extension peptides      |
| PINP                                |
| PICP                                |

tionally high (such as in Paget disease of bone) and concentrations from other sources are not increased and are stable. Because of the multiple sources of origin and the fact that the bone isoform is usually not increased in osteoporosis and other metabolic bone diseases, total alkaline phosphatase has not enjoyed widespread use as a bone remodeling marker.

Bone, liver, and intestinal isoforms of alkaline phosphatase are posttranslational modifications of the same gene product and can be identified by their unique carbohydrate content (16). Measurement of "fractionated" alkaline phosphatase recognizes that heating destroys the skeletal fraction, which can be determined by subtraction of the stable fraction from the total. This procedure is not sufficiently reproducible to be used clinically. Assays for bone alkaline phosphatase [BAP; also known as bone-specific alkaline phosphatase, or skeletal alkaline phosphatase (SAP)] have been developed using electrophoresis, isoelectric focusing, lectin precipitation, and immunoassay techniques. Immunoassay is the method of choice because of high specificity and satisfactory precision. Commercially available immunoassays have been developed that measure either enzyme activity or mass (17–19). Because BAP is cleared by the liver, the skeletal fraction may be increased in patients with liver diseases. There may also be some cross-reaction of BAP antibodies with liver alkaline phosphatase.

#### OSTEOCALCIN

Osteocalcin, the major noncollagen protein of bone matrix, is a small 49-amino acid protein that is rich in glutamic acid (GLA) (20). Osteocalcin is also known as bone GLA protein and BGP. In addition to bone, it is also found in dentin. The function of osteocalcin is not clear; it may serve as a site for hydroxyapatite crystals. In the process of matrix synthesis, some osteocalcin is released and circulates in blood with a short half-life determined mainly by renal clearance. Although no intact osteocalcin is released during bone resorption, fragments are released in vitro and also during resorption and formation (Fig. 3) (21–23). Osteocalcin can be measured by immunoassay in plasma or serum. Osteocalcin is labile in blood. It is reduced in lipemic serum because of binding of osteocalcin to lipids, and osteocalcin may be degraded in vitro by proteolytic enzymes liberated from erythrocytes. Assays for osteocalcin are not standardized (24), and different antibodies clearly recognize different fragments (25, 26). Antibodies that recognize both the intact molecule and the large N-terminal midmolecule fragment appear to provide the best clinical information (27).

Although vitamin K status does not affect the total osteocalcin concentration, it does affect the amount of carboxylation. Undercarboxylated osteocalcin may be a better predictor of certain outcomes such as fracture (28, 29).

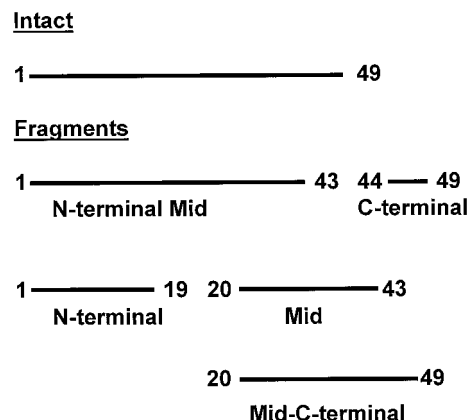

Fig. 3. Circulating forms of osteocalcin.

Reprinted from *Am J Med* 95(Suppl 5A). Delmas PD. Biochemical markers of bone turnover. I. Theoretical considerations and clinical use in osteoporosis, 11S–6S. Copyright 1993, with permission from Excerpta Medica Inc.

#### PROCOLLAGEN EXTENSION PEPTIDES

Osteoblasts secrete large procollagen molecules that undergo extracellular cleavage at the amino and carboxy termini. Byproducts of type 1 collagen synthesis are the amino- and carboxy-terminal procollagen 1 extension peptides (PINP and PICP) (14, 30–33). PINP is an elongated protein of 35 kDa. PICP is a globular protein of 1000 kDa and contains disulfide bonds. Both extension peptides are cleared by the liver. Both may be incorporated into bone matrix. Both can be measured by immunoassay. The concentrations of both increase with increased turnover of nonskeletal collagen (e.g., skin and muscle).

#### Problems with Markers

The ideal marker would have no short-term biologic variability (i.e., stable over at least several days or weeks). The assay would be simple and automatable. There would be a reliable synthetic standard. There would be little or no assay imprecision or interference. The marker could be measured in a convenient nonfasting blood sample or random urine. It would respond rapidly and dramatically to relevant diseases and treatments.

Unfortunately, the ideal marker does not exist. Although changes in remodeling can be extreme, as in Paget disease or renal osteodystrophy, the changes are usually rather subtle, as in osteoporosis.

#### FACTORS RESPONSIBLE FOR VARIABILITY AND FLUCTUATIONS IN BONE MARKERS

Bone remodeling varies in a diurnal rhythm; changes with the phase of the menstrual cycle and the season of the year; is altered by bed rest, exercise, and extremes of diet; and basically is affected by anything that alters bone remodeling. Neither baseline nor posttreatment values for bone markers in the "normal" population follow a gaussian distribution. An individual's rate of remodeling may vary over time.

Urinary excretion of Dpd is 50–70% higher at night



than in the morning (34, 35). Similar fluctuations are seen for other resorption markers. Diurnal variation is less of a factor for alkaline phosphatase (36) and osteocalcin (37) because they have longer half-lives. Diurnal change is not influenced by posture, age, menopause, or osteoporosis (38). The day-to-day variation is ~10% for formation markers and 20% for resorption markers. During the menstrual cycle, marker concentrations are slightly higher in the luteal phase (39). There can be a seasonal change of up to 12%, with values higher in winter than summer (40). Marker concentrations increase during puberty and again after menopause. They are low in late pregnancy (41). After fracture, marker concentrations go up 20–60% and remain high for 6 months or more. With weightlessness or prolonged bed rest, markers increase by 40–50% (42), but the patterns of recovery vary depending on the marker (43).

Markers are only relatively specific for bone. Alkaline phosphatase is derived from nonskeletal sources, and osteocalcin fragments may reflect both resorption and formation. Osteocalcin and BAP give discordant results in conditions such as Paget disease and renal osteodystrophy (44).

Metabolism and the clearance of markers influence their concentrations. For example, the proportions of different fragments of osteocalcin depend on renal function. Liver clearance affects BAP; renal clearance affects NTx, CTx, and pyridinium cross-links (45). Another factor affecting urinary bone markers, which are usually normalized to creatinine, is the variability of creatinine excretion (46).

When there is a change in the rate of remodeling, resorption markers fall faster than formation markers (2–12 weeks for resorption markers, 3–6 months for formation markers) because of the shorter time of resorption than formation.

### General Uses of Bone Markers

Markers can be used in both generalized disorders of bone remodeling, such as osteoporosis or osteogenesis imperfecta, or in localized disorders of bone turnover, such as Paget disease and cancer metastases (47). Because of coupling, a single marker gives useful information. When remodeling rates are changing, a combination of markers, such as one resorption marker and one formation marker, might give more information than a single marker. Eastell et al. (48) have suggested normalizing resorption and formation markers as z-scores and expressing the ratio of a resorption and a formation marker as a “coupling index”.

Multiple or duplicate measurements can be used to minimize the effect of intraindividual variation. Another approach is calculation of the “least significant change” or “critical difference”, which incorporates the biological and analytical variation (49). At  $P < 0.05$ , using a one-tailed approach, the least significant change is 2.33 times the individual CV. It is in the range of 15% for BAP (50)

and osteocalcin (51), and 25–40% for Pyr (49, 51, 52), Dpd (49, 51, 52), and NTx (53, 54).

### Clinical Applications

Clinical questions that might be answered by the use of bone markers include the following: Which patients have low bone mass? Which patients are likely to be losing bone? Is this patient at a high risk of fracture? If treatment is needed, what treatment would be best? Is the patient responding to treatment?

#### WHICH PATIENTS HAVE LOW BONE MASS?

Although bone is a dynamic tissue, studies that have examined the relationship between turnover markers and bone density in young individuals have shown either a weak correlation or none at all (55, 56). The relationship is somewhat stronger in elderly women, but not strong enough to allow the use of a bone marker measurement to identify individuals with low bone mass (57, 58).

#### WHICH PATIENTS ARE LIKELY TO LOSE BONE?

At least two studies have suggested that change in bone mass over time correlates with the concentrations of markers (59, 60). In both of these studies, markers were measured at the end of the observation period. In a prospective study, Chesnut et al. (61) found a modest correlation between baseline urine NTx and the rate of bone loss during the following year in recently menopausal women (Fig. 4). However, no correlation has been seen between baseline bone markers and future bone loss in large prospective studies such as the Postmenopausal Estrogen-Progestin Intervention (PEPI) (62), the Fracture Intervention Trial (63), the Phase III alendronate study (Fig. 5) (64), and other prospective trials (65, 66).

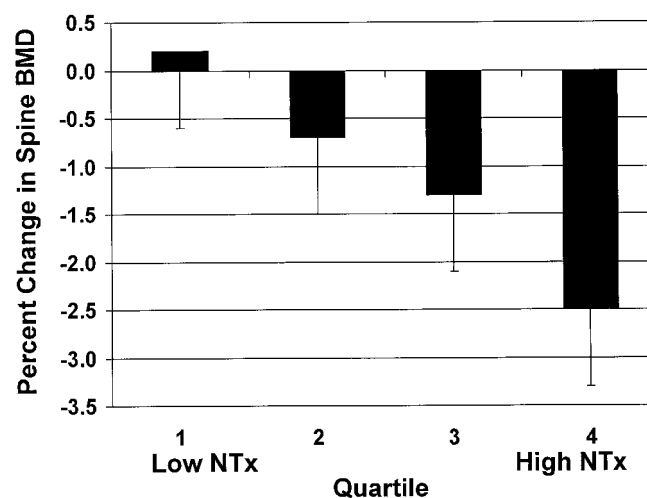

Fig. 4. Relationship between change in spinal BMD and urine NTx in women receiving calcium only for 1 year.

Based on data from Chesnut et al. (61).

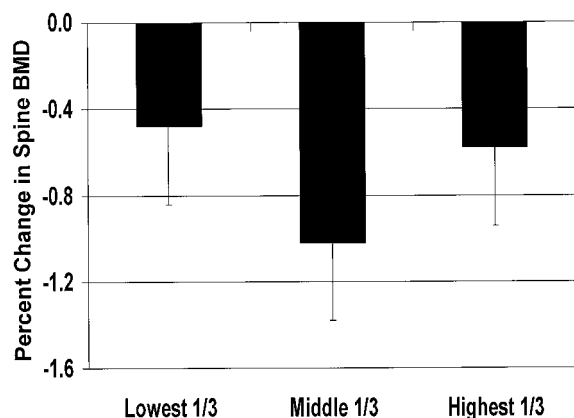

Fig. 5. Relationship between change in spinal BMD and urine Dpd in women receiving calcium only for 3 years.

Based on data from Hirsch et al. (64).

#### IS THIS PATIENT AT HIGH RISK OF FRACTURE?

A French study, Epidemiologie de L'osteoporose (EPI-DOS), evaluated 7598 elderly women and showed correlations between high concentrations of the resorption markers urine CTx and free Dpd and increased hip fracture risk similar in magnitude to that between low hip bone mineral density (BMD) and increased hip fracture risk (67). For urine CTx more than 2 SD above the premenopausal mean, the sensitivity in predicting hip fracture was 36% and the specificity was 81% (64% false negatives and 19% false positives); however, the positive predictive value was only 3%. The correlation was not seen for all resorption markers and was not seen at all for formation markers. Similar findings for the resorption markers total Pyr, free Pyr, total Dpd, and free Dpd in relation to hip fracture emerged from the Rotterdam Study (68), which involved 10 275 men and women 55 years and older. In EPIDOS (67), the combination of low hip BMD and high resorption marker concentration gave greater predictive value for hip fracture than either risk factor alone. However, the number of patients in EPIDOS who fell into the high-risk categories for both of these variables was small (only 16% of the total sample). A relationship between previous fractures and increased Pyr and osteocalcin was seen in a cross-sectional study of 351 women in Rochester, MN (56). Most of the Rochester women with osteoporosis had high bone turnover.

#### IF TREATMENT IS NEEDED, WHAT TREATMENT WOULD BE BEST?

A study of calcitonin treatment for osteoporosis found a dramatic improvement in bone mass in patients who had high bone turnover, and no change in patients who had normal or low turnover (69). In this study, turnover was measured not with biochemical markers, but rather by whole body retention of radiolabeled bisphosphonate. Whether the same result would be seen with markers is uncertain. Because all of the current therapies in use, at least in the US, work by decreasing bone resorption, this

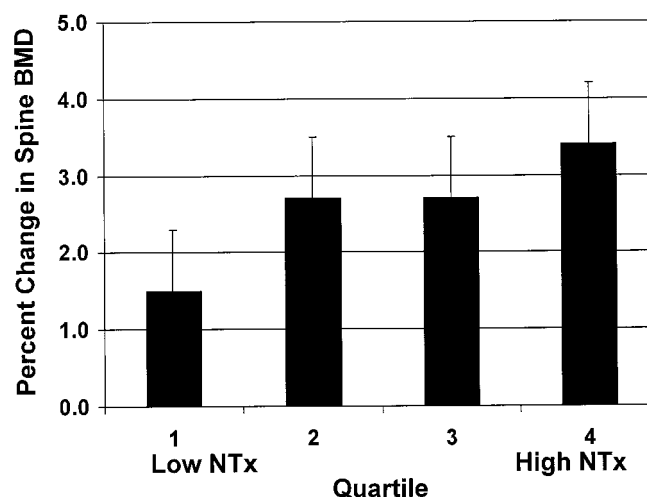

Fig. 6. Relationship between change in spinal BMD and urine NTx in women receiving estrogen for 1 year.

Based on data from Chesnut et al. (61).

question may not be of practical value at present. However, it could be important once bone-anabolic medications are available.

#### IS THE PATIENT RESPONDING TO TREATMENT?

Chesnut et al. (61) found a fairly strong relationship ( $r = 0.25$ ;  $P < 0.01$ ) between baseline urine NTx and BMD response to 1 year of hormone replacement therapy in recently menopausal women (Fig. 6). Greenspan et al. (70) found a similar relationship between urine NTx and BMD response to alendronate. However, other investigators have failed to find consistent correlations between baseline marker concentrations and changes in BMD after treatment with estrogen (62) or alendronate (Fig. 7) (63, 64, 71).

If baseline markers fail to predict changes in BMD with treatment, perhaps changes in the concentrations of markers soon after initiation of treatment would predict later changes in BMD. Women receiving hormone replacement

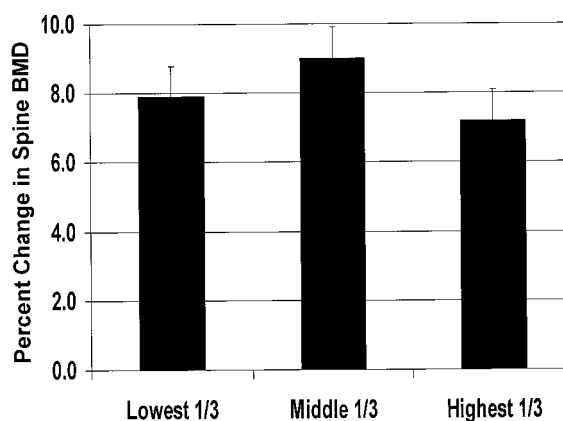

Fig. 7. Relationship between change in BMD and urine Dpd in women receiving 10 mg of alendronate daily for 3 years.

Based on data from Hirsch et al. (64).

therapy who had the greatest decline in NTx at 6 months had the greatest increase in BMD at 1 year (61). A 30% decrease in NTx at 6 months had 80% sensitivity and 59% specificity, with 80% positive and 42% negative predictive values. However, the range of change in urine NTx from baseline to 6 months in the treated group was +192% to -87%. In the same study, correlations were also seen between 6-month changes in free Dpd and BAP and an increase in BMD at 1 year (72). However, these relationships were not confirmed with hormone replacement therapy in the PEPI trial (62). Changes in marker concentrations have been shown to correlate with increases in BMD after alendronate treatment in some studies (70, 73) and with ibandronate (74). The correlations, however, are too weak to use markers to identify "high gainers" vs "low gainers". Of interest, at least with bisphosphonate treatment, is that total and bound Pyr and Dpd decrease substantially but free Pyr and Dpd do not (75).

Different markers exhibit different degrees of change with bisphosphonate therapy (76). NTx showed the greatest decline (58%), but also had the greatest long-term variability (29.5%). BAP was the marker that showed greater than the minimum significant change in the highest number of patients (74%), compared with 57% of patients using NTx or 48% of patients using free Dpd.

There are no published data on BMD change in treated individuals who do not show a change in markers or about marker change in patients who lose bone despite being on treatment. Finally, there is some information suggesting that the change in BMD may not reflect a change in fracture risk (77). If this is true, it would render moot the search for a marker correlation with BMD change after treatment. On the other hand, if the change in fracture risk is related to both changes in bone mass and changes in bone turnover, as suggested by Riggs et al. (78), markers may become a very important tool for assessing the response to treatment.

The use of bone markers in clinical practice is limited by the lack of studies done with markers as the primary endpoint. Most of the information comes from clinical trials of osteoporosis therapies, in which the endpoints were increases in BMD and markers were measured secondarily. Only a few studies have had a decrease in fracture rates as the main endpoint, and none of them specifically examined the relationship between the occurrence of fractures and baseline marker concentrations or between fractures and the change in marker concentrations with treatment. Almost all of the positive data are from studies of elderly women. Although there are some normative data in young women and in men (79), there are essentially no data to guide the use of markers in men or younger women.

Because of a paucity of data, it is difficult for the clinician to know which marker to measure, when to measure it (i.e., baseline or after treatment), and what cut points to use. For almost all of the clinical questions that might be answered with bone markers, positive and

negative predictive values are on the order of 70–80%, with false-negative and false-positive results in 20–30% of patients.

### Current Uses, Future Directions

Having said that guidelines for specific clinical uses of biochemical markers of bone remodeling are lacking, I regularly use bone markers in my clinical practice. I use them (a) to aid in the decision to treat women with borderline low bone mass who are undecided about treatment (treat if the marker is increased, observe if it is not), (b) to determine whether an adequate antiresorptive effect has been achieved in patients who have been on treatment whose follow-up BMD measurements do not meet expectations (certainly for someone whose BMD has decreased substantially, and sometimes for someone who has failed to gain), and (c) to provide an earlier indication of response than can be obtained with BMD in patients with severe osteoporosis, measuring markers at baseline and after 3–6 months of treatment. For these purposes, I use the collagen cross-links, either NTx or Dpd.

Continued research is needed to identify the best marker or combinations of markers for prediction of treatment response (either a change in BMD or antifracture effect) and for prediction of bone loss or fracture in untreated patients. It is not clear that a measurement today will predict BMD or fracture 10 or 20 years in the future. Certainly, efforts at standardization of methods and reduction of preanalytic and analytic variables are important. The use of assays in serum, sweat, or saliva might minimize some of the variability seen with urine markers.

### Conclusions

Bone marker measurements are noninvasive, inexpensive, and can be repeated often. Major changes occur in a short time. Markers are derived from both cortical and trabecular bone and reflect the metabolic activity of the entire skeleton. They do not reflect the activity of individual cells or the process of mineralization. There is large intra- and interindividual variability. Marker concentrations may be affected by the rate of clearance and certainly are likely to be altered after fracture. Markers have been very helpful in studies of the pathogenesis of osteoporosis and in understanding the mechanism of action of therapies. In clinical trials, markers may aid in selecting optimal doses and in understanding the time course of onset and resolution of treatment effect. There are several potential clinical applications for markers of bone remodeling; however, there is a need for more data to help the clinician decide which marker to measure, when to measure it, and which cut point to use.

### References

1. Eyre DR. Collagen cross-linking amino acids. *Methods Enzymol* 1987;144:115–39.
2. Deacon AC, Hulme P, Hesp R, Green JR, Tellez M, Reeve J.

- Estimation of whole body bone resorption rate: a comparison of urinary total hydroxyproline excretion with two radioisotopic tracer methods in osteoporosis. *Clin Chim Acta* 1997;166:297–306.
3. Colwell A, Russell RGG, Eastell R. Factors affecting the assay of urinary 3-hydroxy pyridinium crosslinks of collagen as markers of bone resorption. *Eur J Clin Invest* 1993;23:341–9.
  4. Uebelhart D, Gineyts E, Chapuy M-C, Delmas PD. Urinary excretion of pyridinium crosslinks: a new marker of bone resorption in metabolic bone disease. *Bone Miner* 1990;8:87–96.
  5. Rosano TG, Peaston RT, Bone HG, Woitge HW, Francis RM, Seibel MJ. Urinary free deoxypyridinoline by chemiluminescence immunoassay: analytical and clinical evaluation. *Clin Chem* 1998;44:2126–32.
  6. Seyedin SM, Kung VT, Daniloff YN, Hesley RP, Gomez B, Nielsen LA, et al. Immunoassay for urinary pyridinoline: a new marker of bone resorption. *J Bone Miner Res* 1993;8:635–42.
  7. Robins SP, Woitge H, Hesley R, Ju J, Seyedin S, Seibel MJ. Direct, enzyme-linked immunoassay for urinary deoxypyridinoline as a specific marker for measuring bone resorption. *J Bone Miner Res* 1994;9:1643–9.
  8. Garnero P, Gineyts E, Riou JP, Delmas PD. Assessment of bone resorption with a new marker of collagen degradation in patients with metabolic bone disease. *J Clin Endocrinol Metab* 1994;79:780–5.
  9. Hanson DA, Weis MAE, Bollen A-M, Maslan SL, Singer FR, Eyre DR. A specific immunoassay for monitoring human bone resorption: quantitation of type I collagen cross-linked N-telopeptides in urine. *J Bone Miner Res* 1992;7:1251–8.
  10. Bonde M, Qvist P, Fledelius C, Riis BJ, Christiansen C. Applications of an enzyme immunoassay for a new marker of bone resorption (CrossLaps): follow-up on hormone replacement therapy and osteoporosis risk assessment. *J Clin Endocrinol Metab* 1995;80:864–8.
  11. Bonde M, Garnero P, Fledelius C, Qvist P, Delmas PD, Christiansen C. Measurement of bone degradation products in serum using antibodies reactive with an isomerized form of an 8 amino acid sequence of the C-telopeptide of type I collagen. *J Bone Miner Res* 1997;12:1028–34.
  12. Christgau S, Rosenquist C, Alexandersen P, Bjarnason NH, Ravn P, Fledelius C, et al. Clinical evaluation of the serum CrossLaps One Step ELISA, a new assay measuring the serum concentration of bone-derived degradation products of type I collagen C-telopeptides. *Clin Chem* 1998;44:2290–300.
  13. Gertz BJ, Clemens JD, Holland SD, Yuan W, Greenspan S. Application of a new serum assay for type I collagen cross-linked N-telopeptides: assessment of diurnal change in bone turnover with and without alendronate treatment. *Calcif Tissue Int* 1998;63:102–6.
  14. Scario JK, Glew RH, Bou-Serhal CE, Clemens JD, Garry PJ, Baumgartner RN. Serum levels of cross-linked N-telopeptides and aminoterminal propeptides of type I collagen indicate low bone mineral density in elderly women. *Bone* 1998;23:471–7.
  15. Moss DW. Diagnostic aspects of alkaline phosphatase and its isoenzymes. *Clin Biochem* 1987;20:225–30.
  16. Lehmann FG. Human alkaline phosphatases. Evidence of three isoenzymes (placental, intestinal and liver-bone-kidney-type) by lectin-binding affinity and immunological specificity. *Biochim Biophys Acta* 1980;616:41–59.
  17. Gomez B Jr, Ardakani S, Ju J, Jenkins D, Cerelli MJ, Daniloff GY, Kung VT. Monoclonal antibody assay for measuring bone-specific alkaline phosphatase in serum. *Clin Chem* 1995;41:1560–6.
  18. Garnero P, Delmas PD. Assessment of serum levels of bone alkaline phosphatase with a new immunoradiometric assay in patients with metabolic bone disease. *J Clin Endocrinol Metab* 1993;77:1046–53.
  19. Farley JR, Chesnut CH, Baylink DJ. Improved method for quantitative determination in serum of alkaline phosphatase of skeletal origin. *Clin Chem* 1981;27:2002–7.
  20. Catherwood BD, Marcus R, Madvig P, Cheung AK. Determinants of bone gamma-carboxyglutamic acid-containing protein in plasma of healthy aging subjects. *Bone* 1985;6:9–13.
  21. Delmas PD. Biochemical markers of bone turnover. I. Theoretical considerations and clinical use in osteoporosis. *Am J Med* 1993;95(Suppl 5A):11S–6S.
  22. Garnero P, Grimaux M, Seguin P, Delmas PD. Characterization of immunoreactive forms of human osteocalcin generated in vivo and in vitro. *J Bone Miner Res* 1994;255–64.
  23. Taylor AK, Linkhart S, Mohan S, Christenson RA, Singer FR, Baylink DJ. Multiple osteocalcin fragments in human urine and serum as detected by a midmolecule osteocalcin radioimmunoassay. *J Clin Endocrinol Metab* 1990;70:467–72.
  24. Delmas PD, Christiansen C, Mann KO, Price PA. Bone Gla protein (osteocalcin) assay standardization report. *J Bone Miner Res* 1990;5:5–11.
  25. Masters PW, Jones RG, Purves DA, Cooper EH, Cooney JM. Commercial assays for serum osteocalcin give clinically discordant results. *Clin Chem* 1994;40:358–63.
  26. Knapen MHJ, Nieuwenhuijzen Kruseman AC, Wouters RSME, Vermeer C. Correlation of serum osteocalcin fractions with bone mineral density in women during the first 10 years after menopause. *Calcif Tissue Int* 1998;63:375–9.
  27. Minisola S, Rosso R, Romagnoli E, D'Erasmo E, Manfredi G, Damian C, et al. Serum osteocalcin and bone mineral density at various skeletal sites: a study performed with three different assays. *J Lab Clin Med* 1997;129:422–9.
  28. Szulc P, Chapuy M-C, Meunier PJ, Delmas PD. Serum undercarboxylated osteocalcin is a marker of the risk of hip fracture in elderly women. *J Clin Invest* 1993;91:1769–74.
  29. Vergnaud P, Garnero P, Meunier PJ, Breart G, Kamihagi K, Delmas PD. Undercarboxylated osteocalcin measured with a specific immunoassay predicts hip fracture in elderly women: the EPIDOS study. *J Clin Endocrinol Metab* 1997;82:719–24.
  30. Hassager C, Risteli J, Risteli L, Jensen SB, Christiansen C. Diurnal variation in serum markers of type I collagen synthesis and degradation in healthy premenopausal women. *J Bone Miner Res* 1992;7:1307–11.
  31. Melkko J, Kauppila S, Niemi S, Risteli L, Haukipuro K, Jukkola A, Risteli J. Immunoassay for intact amino-terminal propeptide of human type I procollagen. *Clin Chem* 1996;42:947–54.
  32. Jensen CH, Hansen M, Brandt J, Rasmussen HB, Jensen PB, Tiesner B. Quantification of the N-terminal propeptide of human procollagen type I (PINP): comparison of ELISA and RIA with respect to different molecular forms. *Clin Chim Acta* 1998;269:31–41.
  33. Cheng S, Kovanen V, Heikkinen E, Suominen H. Serum and urine markers of type I collagen metabolism in elderly women with high and low bone turnover. *Eur J Clin Invest* 1996;26:186–91.
  34. Eastell R, Calvo MS, Burritt MF, Offord KP, Russell RGG, Riggs BL. Abnormalities in circadian patterns of bone resorption and renal calcium conservation in type I osteoporosis. *J Clin Endocrinol Metab* 1992;74:487–94.
  35. Blumsohn A, Herrington K, Hannon RA, Shao P, Eyre DR, Eastell R. The effect of calcium supplementation on the circadian rhythm of bone resorption. *J Clin Endocrinol Metab* 1994;79:730–5.
  36. Nielsen HK, Brixen K, Mosekilde L. Diurnal rhythm in serum activity of wheat-germ lectin-precipitable alkaline phosphatase: temporal relationships with the diurnal rhythm of serum osteocalcin. *Scand J Clin Lab Invest* 1990;50:851–6.
  37. Nielsen HK, Brixen K, Mosekilde L. Diurnal rhythm and 24-hour integrated concentrations of serum osteocalcin in normals: influ-



- ence of age, sex, season, and smoking habits. *Calcif Tissue Int* 1990;47:284–90.
38. Schlemmer A, Hassager C, Pedersen BJ, Christiansen C. Posture, age, menopause, and osteopenia do not influence the circadian variation in the urinary excretion of pyridinium crosslinks. *J Bone Miner Res* 1994;9:1883–8.
  39. Nielsen HK, Brixen K, Bouillon R, Mosekilde L. Changes in biochemical markers of osteoblastic activity during the menstrual cycle. *J Clin Endocrinol Metab* 1990;70:1431–7.
  40. Woitge HW, Schneidt-Nave C, Kissling C, Ledig-Bruckner G, Mayer K, Grauer A, et al. Seasonal variation of biochemical indexes of bone turnover: results of a population-based study. *J Clin Endocrinol Metab* 1998;83:68–75.
  41. Karlsson R, Edén S, Eriksson L, Von Schoultz B. Osteocalcin 24-hour profiles during normal pregnancy. *Gynecol Obstet Investig* 1992;34:197–201.
  42. Smith SM, Nillen JL, Leblanc A, Demers LM, Lane HW, Leach CS. Collagen cross-link excretion during space flight and bed rest. *J Clin Endocrinol Metab* 1998;83:3584–91.
  43. Lueken SA, Arnaud SB, Taylor AK, Baylink DJ. Changes in markers of bone formation and resorption in a bed rest model of weightlessness. *J Bone Miner Res* 1993;8:1433–8.
  44. Duda JRJ, O'Brien JF, Katzmann JA, Peterson JM, Mann KG, Riggs BL. Concurrent assays of circulating bone Gla-protein and bone alkaline phosphatase: effects of sex, age, and metabolic bone disease. *J Clin Endocrinol Metab* 1988;66:951–7.
  45. Colwell A, Eastell R. The renal clearance of free and conjugated pyridinium cross-links of collagen. *J Bone Miner Res* 1996;11:1976–80.
  46. Bettica P, Taylor AK, Talbot J, Moro L, Talamini R, Baylink DJ. Clinical performance of galactosyl hydroxyllysine, pyridinoline, and deoxypyridinoline in postmenopausal osteoporosis. *J Clin Endocrinol Metab* 1996;81:542–6.
  47. Takeuchi S-I, Arai K, Saitoh H, Yoshida K-I, Miura M. Urinary pyridinoline and deoxypyridinoline as potential markers of bone metastasis in patients with prostate cancer. *J Urol* 1996;156:1691–5.
  48. Eastell R, Robins SP, Colwell A, Assiri AMA, Riggs BL, Russell RGG. Evaluation of bone turnover in type I osteoporosis using biochemical markers specific for bone formation and bone resorption. *Osteoporosis Int* 1999;3:255–60.
  49. Hannon R, Blumsohn A, Naylor K, Eastell R. Response of biochemical markers of bone turnover to hormone replacement therapy: impact of biological variability. *J Bone Miner Res* 1998;13:1124–33.
  50. Panteghini M, Pagani F. Biological variation in bone-derived biochemical markers in serum. *Scand J Clin Lab Investig* 1995;55:609–16.
  51. Jensen JEB, Sorensen HA, Kollerup G, Jensen LB, Sorensen OH. Biological variation of biochemical bone markers. *Scand J Clin Lab Investig* 1994;54(Suppl 219):36–9.
  52. Jensen JEB, Kollerup G, Sorensen HA, Sorensen OH. Intraindividual variability in bone markers in the urine. *Scand J Clin Lab Investig* 1997;57(Suppl 227):29–34.
  53. Popp-Snijder C, Lips P, Netelenbos JC. Intra-individual variation in bone resorption markers in urine. *Ann Clin Biochem* 1996;33:347–8.
  54. Weiss S, Chesnut C, Eastell R, Flessland K, Cain C, Mallinak N. Determination of the intrasubject variability in NTx excretion in postmenopausal women [Abstract]. *J Bone Miner Res* 1997;12(Suppl 1):S506.
  55. Ravn P, Clemmesen B, Riis BJ, Christiansen C. The effect on bone mass and bone markers of different doses of ibandronate: a new bisphosphonate for prevention and treatment of postmenopausal osteoporosis: a 1-year, randomized, double-blind, placebo-controlled dose-ranging study. *Bone* 1996;19:527–33.
  56. Melton LJ III, Khosla S, Atkinson EJ, O'Fallon WM, Riggs BL. Relationship of bone turnover to bone density and fractures. *J Bone Miner Res* 1997;12:1083–91.
  57. Garnero P, Sornay-Rendu E, Chapuy M-C, Delmas PD. Increased bone turnover in late postmenopausal women is a major determinant of osteoporosis. *J Bone Miner Res* 1996;11:337–49.
  58. Schneider DL, Barrett-Connor EL. Urinary N-telopeptide levels discriminate normal, osteopenic, and osteoporotic bone mineral density. *Arch Intern Med* 1997;157:1241–5.
  59. Dresner-Pollak R, Parker R, Poku M, Thompson J, Seibel M, Greenspan S. Biochemical markers of bone turnover reflect femoral bone loss in elderly women. *Calcif Tissue Int* 1996;59:328–33.
  60. Ross PD, Knowlton W. Rapid bone loss is associated with increased levels of biochemical markers. *J Bone Miner Res* 1997;13:297–302.
  61. Chesnut CH III, Bell NH, Clark GS, Drinkwater BL, English SC, Johnson CC Jr, et al. Hormone replacement therapy in postmenopausal women: urinary N-telopeptide of type I collagen monitors therapeutic effect and predicts response of bone mineral density. *Am J Med* 1997;102:29–37.
  62. Marcus R, Holloway L, Wells B. Turnover markers only weakly predict bone response to estrogen: the Postmenopausal Estrogen/Progestin Interventions Trial (PEPI) [Abstract]. *J Bone Miner Res* 1997;12(Suppl 1):S103.
  63. Bauer DC, Black DM, Ott SM, Santora A, Thompson D, Ennis M, Cummings SR. Biochemical markers predict spine but not hip BMD response to alendronate: the Fracture Intervention Trial [Abstract]. *J Bone Miner Res* 1997;12(Suppl 1):S150.
  64. Hirsch L, Watts N, McIlwain H, Rodriguez J, Romanowicz A, Daifotis A, et al. Efficacy of alendronate is similar irrespective of baseline bone turnover, BMD, and age [Abstract]. *J Bone Miner Res* 1995;10(Suppl 1):S350.
  65. Keen RW, Nguyen T, Sobnack R, Perry LA, Thompson PW, Spector TD. Can biochemical markers predict bone loss at the hip and spine? A 4-year prospective study of 141 early postmenopausal women. *Osteoporosis Int* 1996;6:399–406.
  66. Cosman F, Nieves J, Wilkinson C, Schnering D, Shen V, Lindsay R. Bone density change and biochemical indices of skeletal turnover. *Calcif Tissue Int* 1996;58:236–43.
  67. Garnero P, Hausherr E, Chapuy M-C, Marcelli C, Grandjean H, Muller C, et al. Markers of bone resorption predict hip fracture in elderly women: the EPIDOS prospective study. *J Bone Miner Res* 1996;11:1531–8.
  68. van Daele PLA, Seibel MJ, Burger H, Hofman A, Gobbée DE, van Leeuwen JP, et al. Case-control analysis of bone resorption markers, disability, and hip fracture risk: the Rotterdam study. *Br Med J* 1996;312:482–3.
  69. Civitelli R, Gonnelli S, Zacchei F, Bigazzi S, Vattimo A, Aivola LV, Gennari C. Bone turnover in postmenopausal osteoporosis. Effect of calcitonin treatment. *J Clin Investig* 1988;82:1268–74.
  70. Greenspan SL, Parker RA, Ferguson L, Rosen HN, Maitland-Ramsey L, Karpf DB. Early changes in biochemical markers of bone turnover predict the long-term response to alendronate therapy in representative elderly women: a randomized clinical trial. *J Bone Miner Res* 1998;13:1431–8.
  71. Bone HG, Downs RW Jr, Tucci JR, Harris ST, Weinstein RS, Licata M, et al. Dose-response relationships for alendronate treatment in osteoporotic elderly women. *J Clin Endocrinol Metab* 1997;82:265–74.
  72. Rosen C, Chesnut CH, Mallinak NJS. The predictive value of biochemical markers of bone turnover for bone mineral density in early postmenopausal women treated with hormone replacement

- therapy or calcium supplementation. *J Clin Endocrinol Metab* 1997;82:1904–10.
73. Garnero P, Shih WJ, Gineyts E, Karpf DB, Delmas PD. Comparison of new biochemical markers of bone turnover in late postmenopausal osteoporotic women in response to alendronate treatment. *J Clin Endocrinol Metab* 1994;79:1693–700.
74. Ravn P, Christensen JO, Baumann M, Clemmesen B. Changes in biochemical markers and bone mass after withdrawal of ibandronate treatment: prediction of bone mass changes during treatment. *Bone* 1998;22:559–64.
75. Garnero P, Gineyts E, Arbault P, Christiansen C, Delmas PD. Different effects of bisphosphonate and estrogen therapy on free and peptide-bound bone cross-links excretion. *J Bone Miner Res* 1995;10:641–9.
76. Rosen HN, Moses AC, Garber J, Ross DS, Lee SL, Greenspan SL. Utility of biochemical markers of bone turnover in the follow-up of patients treated with bisphosphonates. *Calcif Tissue Int* 1998; 63:363–8.
77. Cummings SR, Black DM, Vogt TM, for the FIT Research Group. Changes in BMD substantially underestimate the anti-fracture effects of alendronate and other antiresorptive drugs [Abstract]. *J Bone Miner Res* 1996;11:S102.
78. Riggs BL, Melton LJ III, O'Fallon WM. Drug therapy for vertebral fractures in osteoporosis: evidence that decreases in bone turnover and increases in bone mass both determine antifracture efficacy. *Bone* 1996;18(Suppl 3):197S–201S.
79. Orwoll ES, Bell NH, Nanes MS, Flessland KA, Pettinger MB, Mallinak NJ, Cain DF. Collagen N-telopeptide excretion in men: the effects of age and intrasubject variability. *J Clin Endocrinol Metab* 1998;83:3930–5.
